# Supplementary material for: Accurate quantification of bacterial abundance in metagenomic DNAs accounting for variable DNA integrity levels
Source: PubMed Central journal article supplement — Microb Genom. 2020 Aug 4;6(10):mgen000417. doi: 10.1099/mgen.0.000417 (PMC7660251; doi:10.1099/mgen.0.000417), 2020-08-04
Supplement: mgen-6-417-s001.pdf [file mgen-6-417-s001.pdf]

## **Supplementary materials**

**Accurate quantification of bacterial 16S rRNA gene copy number in metagenomic DNAs accounting variable DNA integrity levels**

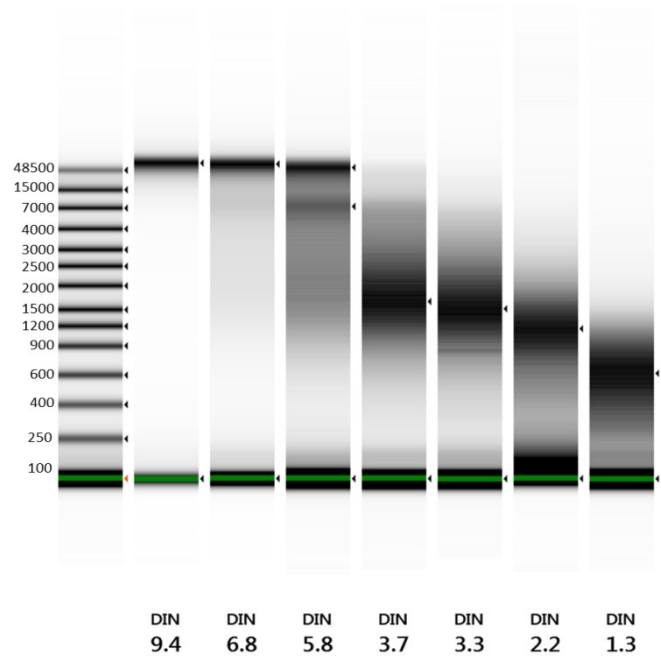

**Fig. S1. Qualitative analysis of one of the 5 independent replicates of the ZymoBIOMICS/humDNA mock, at different degradation levels by Agilent 2200 TapeStation.** First lane represents the original ZymoBIOMICS/humDNA showing the highest DNA quality (DIN 9.4); moving from left to right lanes, a degradation series of the ZymoBIOMICS/humDNA mock obtained by setting different sonication parameters, is shown.

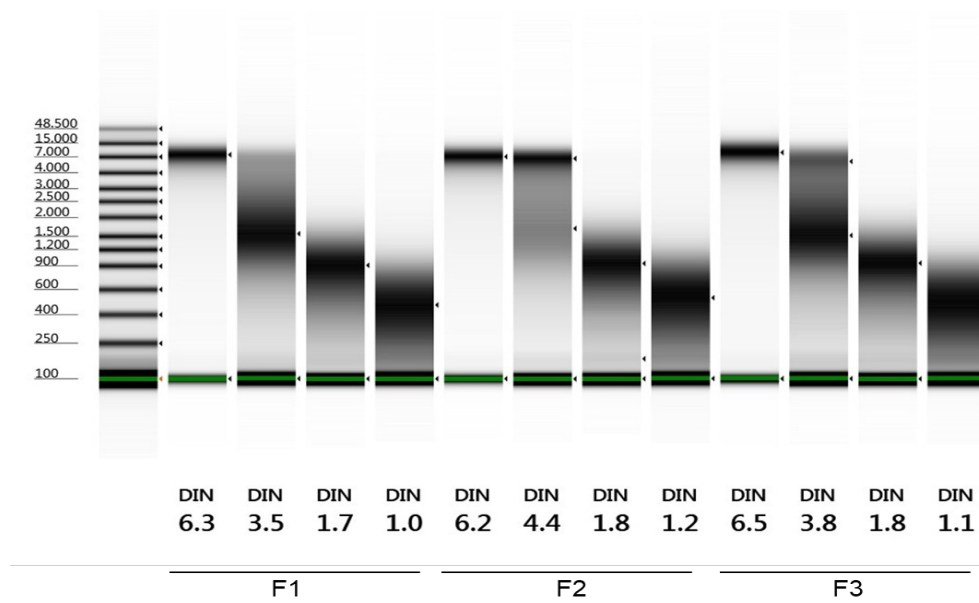

**Fig. S2. Qualitative analysis of the three metagenomic DNAs (F1-F2-F3), at different degradation level, by Agilent 2200 TapeStation.** For each sample, first lane represents the original sample (DIN  $6.5 \pm 0.6$ ). Moving from left to right lanes, 3 degradation levels, obtained by setting different sonication parameters, are

shown and corresponding to DIN4 (DIN 4.5±1), DIN2 (DIN 2.05±0.35) and DIN1 (DIN 1.35±0.35).

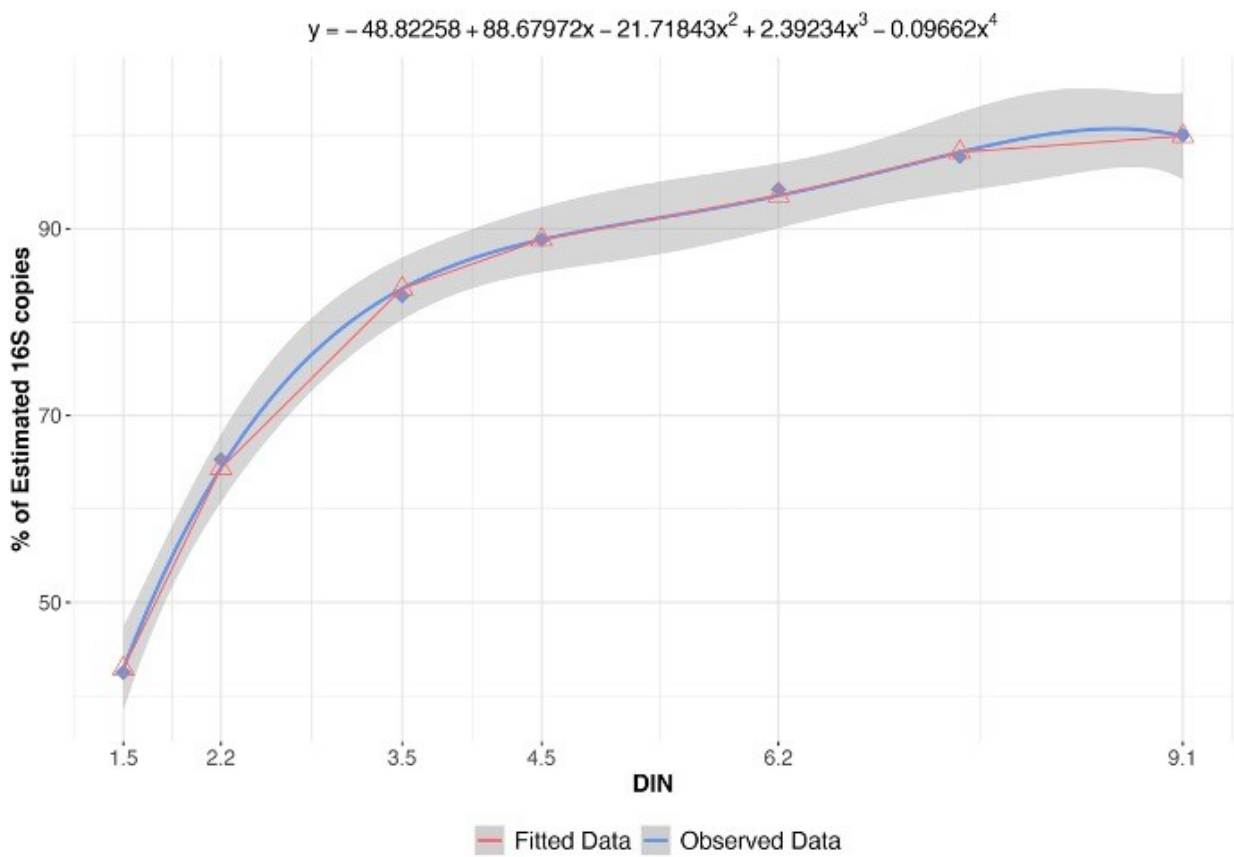

**Fig. S3. Graphical representation of the inferred polynomial regression model used to predict the percentage of 16S rRNA copies underestimation as a function of the measured DIN.** Scatter plot representing the percentage of 16S rRNA copies underestimation as a function of the measured DIN in ZymoBIOMICS/gDNA DNA mixture. In particular, blue points and red triangles represent the observed and the inferred percentage of 16S rRNA copies underestimation, respectively. The blue and the red line represents the regression interpolation between the observed and estimated values, respectively.

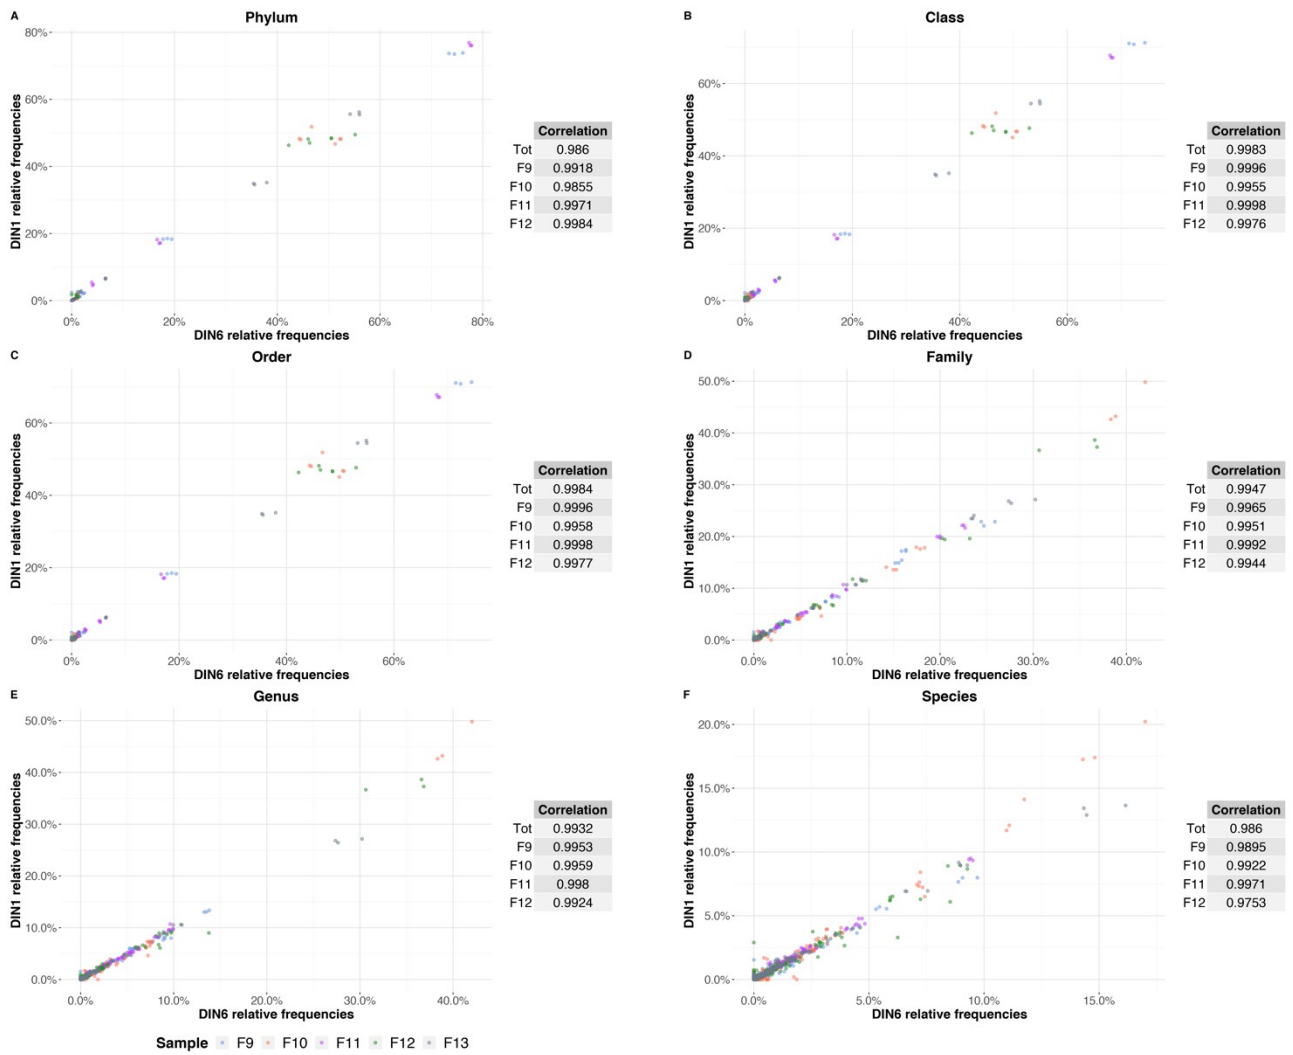

**Fig. S4. Representation of the observed relative abundances in DIN6 and DIN1 samples and Pearson correlation.** Scatter plot representing the observed the taxa relative abundances in DIN6 and DIN1 samples and summarized at 6 taxonomic levels (i.e. phylum, class, order, family, genus and species). Points are colored according to the samples. Beside the plot the observed Pearson correlation between DIN6 and DIN1 relative frequencies is reported for all data and per sample.

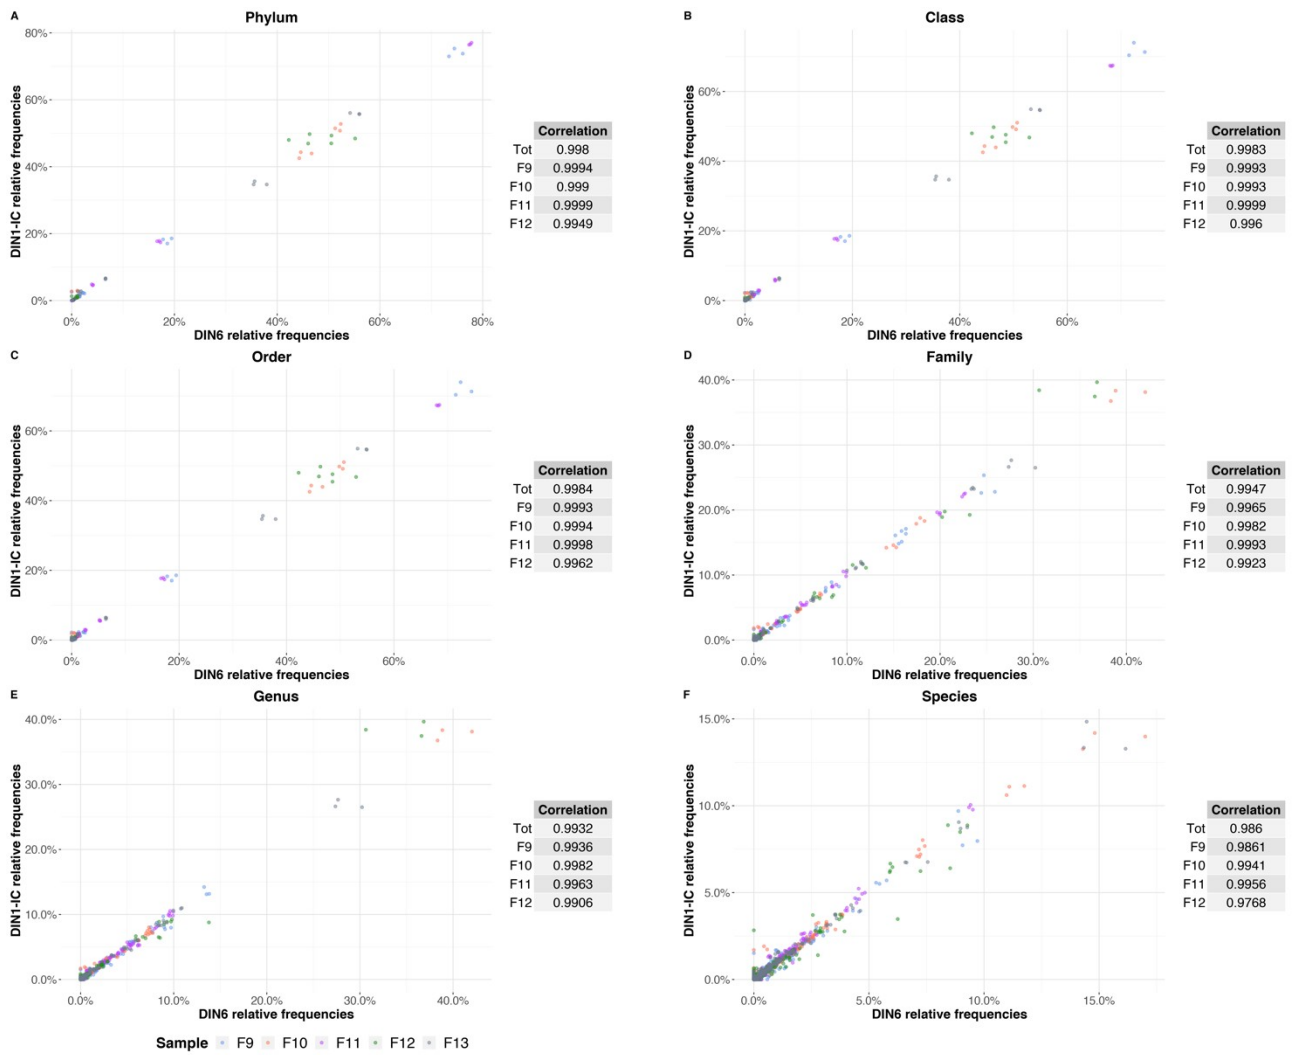

**Fig. S5. Representation of the observed relative abundances in DIN6 and DIN1-IC samples and Pearson correlation.** Scatter plot representing the observed the taxa relative abundances in DIN6 and DIN1-IC samples and summarized at 6 taxonomic levels (i.e. phylum, class, order, family, genus and species). Points are colored according to the samples. Beside the plot the observed Pearson correlation between DIN6 and DIN1-IC relative frequencies is reported for all data and per sample.

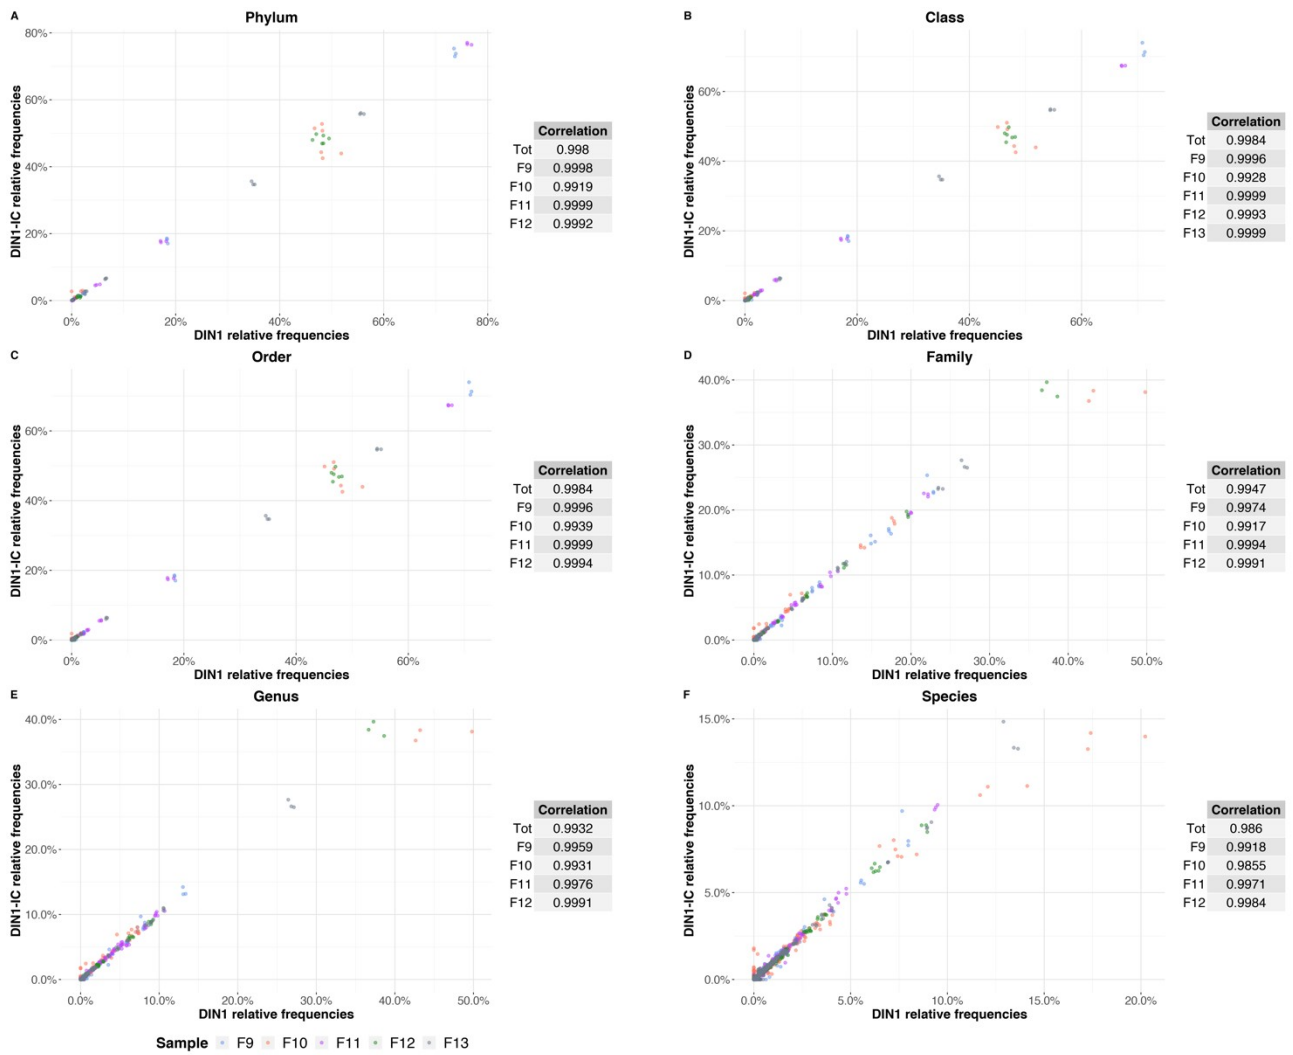

**Fig. S6. Representation of the observed relative abundances in DIN1 and DIN1-IC samples and Pearson correlation.** Scatter plot representing the observed the taxa relative abundances in DIN1 and DIN1-IC samples and summarized at 6 taxonomic levels (i.e. phylum, class, order, family, genus and species). Points are colored according to the samples. Beside the plot the observed Pearson correlation between DIN1 and DIN1-IC relative frequencies is reported for all data and per sample.



| DIN     | Total 16S copies/ng | SD      | Underestimation vs DIN9 (%) | SD    |
|---------|---------------------|---------|-----------------------------|-------|
| 9.1±0.1 | 1,387,126           | ± 56974 | /                           | /     |
| 7.5±0.3 | 1,355,263           | ± 44705 | 3.1                         | ± 1.8 |
| 6.2±0.4 | 1,306,880           | ± 60842 | 5.5                         | ± 2.2 |
| 4.5±0.3 | 1,231,914           | ± 59374 | 11.1                        | ± 2.8 |
| 3.5±0.3 | 1,148,583           | ± 64630 | 17.2                        | ± 4.7 |
| 2.2±0.3 | 906,182             | ± 40182 | 34.7                        | ± 2.9 |
| 1.5±0.3 | 589,273             | ± 61146 | 57.5                        | ± 4.4 |

**Table S1. 16S rRNA copy number quantification in ZymoBIOMICS/humDNA mock with different DINs.** For each degradation level, the 16S rRNA copies/ng DNA quantified by ddPCR, the underestimation calculated as percentage (%) of 16S un-detected copies compared to highest quality mock (DIN 9.1±0.1) are reported. Values are reported as mean of duplicates of 5 independent replicates, for each DIN value ± SD.

| DIN       | Sample | Total 16S<br>copies/ng<br>DNA | SD     | Total 16S<br>copies/ng<br>Mean | SD<br>Mean | Underestimation<br>vs DIN 6 (%) | SD   | Underestimation<br>(%) Mean | SD Mean |
|-----------|--------|-------------------------------|--------|--------------------------------|------------|---------------------------------|------|-----------------------------|---------|
| 6.5±0.6   | F1     | 1223124                       | 57803  | 1144734                        | 203336     | 0                               | 0    | 0                           | 0       |
|           | F2     | 1361889                       | 245888 |                                |            | 0                               | 0    |                             |         |
|           | F3     | 1282938                       | 105955 |                                |            | 0                               | 0    |                             |         |
|           | F4     | 1331529                       | 85439  |                                |            | 0                               | 0    |                             |         |
|           | F5     | 1321086                       | 141547 |                                |            | 0                               | 0    |                             |         |
|           | F6     | 1151349                       | 201438 |                                |            | 0                               | 0    |                             |         |
|           | F7     | 1086539                       | 155931 |                                |            | 0                               | 0    |                             |         |
|           | F8     | 1329989                       | 69962  |                                |            | 0                               | 0    |                             |         |
|           | F9     | 701284                        | 55346  |                                |            | 0                               | 0    |                             |         |
|           | F10    | 900000                        | 65309  |                                |            | 0                               | 0    |                             |         |
|           | F11    | 1165279                       | 123914 |                                |            | 0                               | 0    |                             |         |
|           | F12    | 1132581                       | 153796 |                                |            | 0                               | 0    |                             |         |
|           | F13    | 893960                        | 42420  |                                |            | 0                               | 0    |                             |         |
| 4.5±1     | F1     | 1091539                       | 103597 | 996223                         | 182890     | 5.8                             | 3.2  | 11.1                        | 7.1     |
|           | F2     | 1107400                       | 78279  |                                |            | 3.9                             | 2.0  |                             |         |
|           | F3     | 1049361                       | 82566  |                                |            | 11.2                            | 5.7  |                             |         |
|           | F4     | 1131488                       | 39292  |                                |            | 11.4                            | 3.0  |                             |         |
|           | F5     | 1258400                       | 106302 |                                |            | 8.5                             | 6.8  |                             |         |
|           | F6     | 984413                        | 90103  |                                |            | 14.5                            | 7.8  |                             |         |
|           | F7     | 1086539                       | 155931 |                                |            | 2.4                             | 1.8  |                             |         |
|           | F8     | 1179676                       | 69962  |                                |            | 20.6                            | 6.8  |                             |         |
|           | F9     | 677229                        | 85770  |                                |            | 3.4                             | 12.2 |                             |         |
|           | F10    | 647391                        | 226664 |                                |            | 28.1                            | 25.2 |                             |         |
|           | F11    | 957450                        | 52688  |                                |            | 17.8                            | 4.5  |                             |         |
|           | F12    | 872321                        | 71610  |                                |            | 23.0                            | 6.3  |                             |         |
|           | F13    | 907696                        | 13624  |                                |            | -2.0                            | 1.5  |                             |         |
| 2.05±0.35 | F1     | 876115                        | 79581  | 733039                         | 105534     | 22.7                            | 6.5  | 35.2                        | 7.6     |
|           | F2     | 763376                        | 102681 |                                |            | 35.5                            | 8.7  |                             |         |
|           | F3     | 715735                        | 50826  |                                |            | 44.2                            | 4.0  |                             |         |
|           | F4     | 843066                        | 82614  |                                |            | 36.7                            | 6.2  |                             |         |
|           | F5     | 886205                        | 32302  |                                |            | 32.9                            | 2.4  |                             |         |
|           | F6     | 716005                        | 61184  |                                |            | 48.8                            | 4.4  |                             |         |
|           | F7     | 662184                        | 42253  |                                |            | 39.1                            | 3.9  |                             |         |
|           | F8     | 703366                        | 108543 |                                |            | 45.1                            | 9.2  |                             |         |
|           | F9     | 546509                        | 21479  |                                |            | 22.1                            | 3.1  |                             |         |
|           | F10    | 572561                        | 45815  |                                |            | 36.4                            | 5.1  |                             |         |
|           | F11    | 799559                        | 90359  |                                |            | 31.4                            | 7.8  |                             |         |
|           | F12    | 672387                        | 48567  |                                |            | 41.0                            | 4.3  |                             |         |
|           | F13    | 772435                        | 111698 |                                |            | 11.0                            | 12.5 |                             |         |
| 1.35±0.35 | F1     | 504369                        | 56572  | 497605                         | 82871      | 60.5                            | 5.9  | 56.9                        | 6.8     |
|           | F2     | 489871                        | 35727  |                                |            | 58.6                            | 3.0  |                             |         |
|           | F3     | 504795                        | 62743  |                                |            | 60.7                            | 4.9  |                             |         |
|           | F4     | 595220                        | 55114  |                                |            | 55.3                            | 4.1  |                             |         |
|           | F5     | 599077                        | 46067  |                                |            | 54.7                            | 3.5  |                             |         |
|           | F6     | 589600                        | 50994  |                                |            | 70.3                            | 6.2  |                             |         |
|           | F7     | 365542                        | 11535  |                                |            | 66.4                            | 1.1  |                             |         |
|           | F8     | 379608                        | 45943  |                                |            | 66.2                            | 3.9  |                             |         |
|           | F9     | 438346                        | 50134  |                                |            | 37.5                            | 7.1  |                             |         |
|           | F10    | 385363                        | 25225  |                                |            | 57.2                            | 2.8  |                             |         |
|           | F11    | 547997                        | 71955  |                                |            | 53.0                            | 6.2  |                             |         |

|     |        |       |      |     |
|-----|--------|-------|------|-----|
| F12 | 559273 | 75166 | 51.0 | 6.6 |
| F13 | 509811 | 90310 | 43.0 | 10  |

**Table S2. 16S rRNA copy number quantification in 13 metagenomic DNA samples with different degradation level.** For each DIN value, the 16S copies/ng DNA in 13 metagenomic DNAs (F1-F13) quantified by ddPCR. the underestimation calculated as percentage (%) of 16S undetected copies compared to highest quality DNA (DIN 6.5±0.6) are reported. Values are reported as mean of at least three replicate experiments ± SD.

| DIN                           | Sample | Total 16S copies | SD     | <i>A. muciniphila</i> 16S copies | SD     | Ratio 16S <i>A. muciniphila</i> /total 16S (%) |
|-------------------------------|--------|------------------|--------|----------------------------------|--------|------------------------------------------------|
| 6.3±0.4                       | F9     | 619827           | 131915 | 10537                            | 2273.2 | 1.7                                            |
|                               | F10    | 795695           | 9102   | 7641                             | 1067.3 | 1.0                                            |
|                               | F11    | 1082260          | 210534 | 6462                             | 249.5  | 0.6                                            |
|                               | F12    | 1094413          | 130301 | 2240                             | 127.3  | 0.2                                            |
|                               | F13    | 908216           | 33515  | 1087                             | 129.7  | 0.1                                            |
| 1.2±0.2                       | F9     | 269587           | 65960  | 4543                             | 363.5  | 1.7                                            |
|                               | F10    | 386099           | 29420  | 3084                             | 440.6  | 0.8                                            |
|                               | F11    | 348731           | 88900  | 2296                             | 119.1  | 0.7                                            |
|                               | F12    | 520198           | 60541  | 1033                             | 109.3  | 0.2                                            |
|                               | F13    | 487064           | 35054  | 508                              | 28.6   | 0.1                                            |
| 1.2±0.2<br>input<br>corrected | F9     | 618696           | 86434  | 11980                            | 890.2  | 1.9                                            |
|                               | F10    | 788188           | 56716  | 7446                             | 283.2  | 0.9                                            |
|                               | F11    | 915742           | 52889  | 7113                             | 775.9  | 0.8                                            |
|                               | F12    | 1192981          | 71564  | 2568                             | 68.1   | 0.2                                            |
|                               | F13    | 896312           | 13282  | 1080                             | 175.5  | 0.1                                            |

**Table S3. Total and *A. muciniphila* 16S copy number quantification in 5 metagenomic DNA samples at DIN6, DIN1 and input corrected DIN1 values.** For each DIN value, the total and the *A. muciniphila* 16S copies quantified by ddPCR are reported as mean of at least duplicate experiments ± SD. for each sample. The *A. muciniphila* 16S copies relative abundance was calculated as the percentage ratio (%) between *A. muciniphila* 16S copies and total 16S copies in each sample.

| rank   | Sbj     | DIN6 | DIN1 | DIN1-IC | Common<br>DIN6 - DIN1 | Only in<br>DIN6 | Only in<br>DIN1 | Common<br>DIN6 - DIN1-<br>IC | Only in<br>DIN6 | Only in<br>DIN1-IC | Common<br>DIN1 - DIN1-<br>IC | Only in<br>DIN1 | Only in<br>DIN1-IC | Common<br>to all | %<br>Common |
|--------|---------|------|------|---------|-----------------------|-----------------|-----------------|------------------------------|-----------------|--------------------|------------------------------|-----------------|--------------------|------------------|-------------|
| phylum | F9      | 6    | 6    | 6       | 6                     | 0               | 0               | 6                            | 0               | 0                  | 6                            | 0               | 0                  | 6                | 100,0%      |
|        | F1<br>3 | 4    | 4    | 4       | 4                     | 0               | 0               | 4                            | 0               | 0                  | 4                            | 0               | 0                  | 4                | 100,0%      |
|        | F1<br>2 | 4    | 4    | 4       | 4                     | 0               | 0               | 4                            | 0               | 0                  | 4                            | 0               | 0                  | 4                | 100,0%      |
|        | F1<br>1 | 4    | 4    | 4       | 4                     | 0               | 0               | 4                            | 0               | 0                  | 4                            | 0               | 0                  | 4                | 100,0%      |
|        | F1<br>0 | 5    | 5    | 5       | 5                     | 0               | 0               | 5                            | 0               | 0                  | 5                            | 0               | 0                  | 5                | 100,0%      |
| class  | F9      | 7    | 7    | 7       | 7                     | 0               | 0               | 7                            | 0               | 0                  | 7                            | 0               | 0                  | 7                | 100,0%      |
|        | F1<br>3 | 5    | 5    | 5       | 5                     | 0               | 0               | 5                            | 0               | 0                  | 5                            | 0               | 0                  | 5                | 100,0%      |
|        | F1<br>2 | 3    | 4    | 3       | 2                     | 1               | 2               | 2                            | 1               | 1                  | 3                            | 1               | 0                  | 2                | 40,0%       |
|        | F1<br>1 | 7    | 7    | 7       | 7                     | 0               | 0               | 7                            | 0               | 0                  | 7                            | 0               | 0                  | 7                | 100,0%      |
|        | F1<br>0 | 6    | 5    | 7       | 4                     | 2               | 1               | 5                            | 1               | 2                  | 5                            | 0               | 2                  | 4                | 50,0%       |
| order  | F9      | 7    | 7    | 7       | 7                     | 0               | 0               | 7                            | 0               | 0                  | 7                            | 0               | 0                  | 7                | 100,0%      |
|        | F1<br>3 | 4    | 5    | 4       | 4                     | 0               | 1               | 4                            | 0               | 0                  | 4                            | 1               | 0                  | 4                | 80,0%       |
|        | F1<br>2 | 3    | 4    | 3       | 2                     | 1               | 2               | 2                            | 1               | 1                  | 3                            | 1               | 0                  | 2                | 40,0%       |
|        | F1<br>1 | 8    | 8    | 8       | 8                     | 0               | 0               | 8                            | 0               | 0                  | 8                            | 0               | 0                  | 8                | 100,0%      |
|        | F1<br>0 | 6    | 5    | 7       | 4                     | 2               | 1               | 5                            | 1               | 2                  | 5                            | 0               | 2                  | 4                | 50,0%       |
| family | F9      | 14   | 16   | 15      | 14                    | 0               | 2               | 14                           | 0               | 1                  | 15                           | 1               | 0                  | 14               | 87,5%       |
|        | F1<br>3 | 10   | 11   | 10      | 10                    | 0               | 1               | 10                           | 0               | 0                  | 10                           | 1               | 0                  | 10               | 90,9%       |

|                |                 |    |    |    |    |   |   |    |   |   |    |   |   |    |        |
|----------------|-----------------|----|----|----|----|---|---|----|---|---|----|---|---|----|--------|
|                | <b>F1<br/>2</b> | 9  | 8  | 8  | 7  | 2 | 1 | 7  | 2 | 1 | 8  | 0 | 0 | 7  | 70,0%  |
|                | <b>F1<br/>1</b> | 15 | 15 | 16 | 15 | 0 | 0 | 15 | 0 | 1 | 15 | 0 | 1 | 15 | 93,7%  |
|                | <b>F1<br/>0</b> | 13 | 12 | 14 | 11 | 2 | 1 | 12 | 1 | 2 | 12 | 0 | 2 | 11 | 73,3%  |
| <b>genus</b>   | <b>F9</b>       | 26 | 28 | 27 | 26 | 0 | 2 | 26 | 0 | 1 | 27 | 1 | 0 | 26 | 92,9%  |
|                | <b>F1<br/>3</b> | 20 | 20 | 19 | 20 | 0 | 0 | 19 | 1 | 0 | 19 | 1 | 0 | 19 | 95,0%  |
|                | <b>F1<br/>2</b> | 16 | 17 | 17 | 14 | 2 | 3 | 14 | 2 | 3 | 17 | 0 | 0 | 14 | 73,7%  |
|                | <b>F1<br/>1</b> | 24 | 24 | 24 | 24 | 0 | 0 | 24 | 0 | 0 | 24 | 0 | 0 | 24 | 100,0% |
|                | <b>F1<br/>0</b> | 20 | 19 | 21 | 18 | 2 | 1 | 19 | 1 | 2 | 19 | 0 | 2 | 18 | 81,8%  |
| <b>species</b> | <b>F9</b>       | 36 | 37 | 36 | 36 | 0 | 1 | 36 | 0 | 0 | 36 | 1 | 0 | 36 | 97,3%  |
|                | <b>F1<br/>3</b> | 31 | 32 | 30 | 31 | 0 | 1 | 30 | 1 | 0 | 30 | 2 | 0 | 30 | 93,7%  |
|                | <b>F1<br/>2</b> | 31 | 29 | 29 | 26 | 5 | 3 | 27 | 4 | 2 | 28 | 1 | 1 | 26 | 76,5%  |
|                | <b>F1<br/>1</b> | 38 | 36 | 36 | 36 | 2 | 0 | 36 | 2 | 0 | 36 | 0 | 0 | 36 | 94,7%  |
|                | <b>F1<br/>0</b> | 35 | 31 | 36 | 30 | 5 | 1 | 33 | 2 | 3 | 30 | 1 | 6 | 29 | 76,3%  |

**Table S4. Summary of common and uncommon observed taxa in metabarcoding analysis between the tested DNA qualities.** For each taxonomic rank (i.e. phylum, class, order, family, genus) and for each subject (i.e. Sbj) are listed the number of observed taxa per DNA qualities (i.e. DIN6, DIN1 and DIN1-IC). Following, the observed taxa were pairwise compared among the DNA qualities and the number of common (e.g. Common to DIN6 DIN1) and uncommon taxa (e.g. Only in DIN6, Only in DIN1) are shown. Finally, The number of taxa observed in all samples (i.e. Common to all) and the relative abundance referred to the total number of observed taxa (i.e. % Common) are displayed.

| rank    | Sbj | taxon                                    | DIN6  | DIN1  | DIN1-IC |
|---------|-----|------------------------------------------|-------|-------|---------|
| class   | F12 | <i>Actinobacteria</i>                    | 0,43% | 0,89% | 0,91%   |
|         | F12 | <i>Coriobacteriia</i>                    | 0,24% | 0,67% | 0,42%   |
|         | F10 | <i>Actinobacteria</i>                    | 0,41% | 0,14% | 0,70%   |
|         | F10 | <i>Coriobacteriia</i>                    | 0,37% | 1,16% | 2,13%   |
| order   | F13 | <i>Eggerthellales</i>                    | 0,20% | 0,61% | 0,41%   |
|         | F12 | <i>Coriobacteriales</i>                  | 0,18% | 0,51% | 0,29%   |
|         | F12 | <i>Bifidobacteriales</i>                 | 0,40% | 0,84% | 0,86%   |
|         | F10 | <i>Coriobacteriales</i>                  | 0,34% | 1,10% | 1,91%   |
|         | F10 | <i>Bifidobacteriales</i>                 | 0,27% | 0,14% | 0,51%   |
| family  | F9  | <i>Odoribacteraceae</i>                  | 0,46% | 0,51% | 0,54%   |
|         | F9  | <i>Oscillospiraceae</i>                  | 0,32% | 0,64% | 0,48%   |
|         | F13 | <i>Eggerthellaceae</i>                   | 0,20% | 0,61% | 0,41%   |
|         | F12 | <i>Bifidobacteriaceae</i>                | 0,40% | 0,84% | 0,86%   |
|         | F11 | <i>Atopobiaceae</i>                      | 0,45% | 0,48% | 0,52%   |
|         | F10 | <i>Bifidobacteriaceae</i>                | 0,27% | 0,14% | 0,51%   |
|         | F10 | <i>Coriobacteriaceae</i>                 | 0,34% | 1,10% | 1,91%   |
| genus   | F9  | <i>Oscillibacter</i>                     | 0,32% | 0,64% | 0,48%   |
|         | F9  | <i>Anaerofilum</i>                       | 0,49% | 0,60% | 0,56%   |
|         | F12 | <i>Paraprevotella</i>                    | 0,36% | 0,56% | 0,54%   |
|         | F12 | <i>Bifidobacterium</i>                   | 0,40% | 0,84% | 0,86%   |
|         | F12 | <i>Eisenbergiella</i>                    | 0,41% | 0,65% | 0,59%   |
|         | F10 | <i>Collinsella</i>                       | 0,34% | 1,10% | 1,78%   |
|         | F10 | <i>Bifidobacterium</i>                   | 0,27% | 0,14% | 0,51%   |
| species | F9  | <i>Alistipes</i> sp. NML05A004           | 0,40% | 0,63% | 0,40%   |
|         | F13 | <i>Bacteroides thetaiotaomicron</i>      | 0,39% | 0,50% | 0,41%   |
|         | F12 | <i>Parabacteroides chinchillae</i>       | 0,35% | 0,52% | 0,47%   |
|         | F12 | <i>Bifidobacterium adolescentis</i>      | 0,35% | 0,70% | 0,64%   |
|         | F12 | <i>Paraprevotella clara</i>              | 0,36% | 0,56% | 0,54%   |
|         | F10 | <i>Collinsella aerofaciens</i>           | 0,34% | 1,10% | 1,78%   |
|         | F10 | <i>Bifidobacterium pseudocatenulatum</i> | 0,27% | 0,14% | 0,51%   |
|         | F10 | <i>Alistipes</i> sp. RMA 9912            | 0,38% | 0,44% | 0,64%   |

**Table S5. Inspection of uncommon taxa relative abundances.** The relative abundances of uncommon taxa, differing among the three tested DNA qualities, are shown. The relative abundances are listed per each sample and are expressed as the average value of the three replicates.

| Rank    | Sbj     | Correlation<br>DIN6 - DIN1 | p-value | Correlation<br>DIN6 - DIN1-IC | p-value | Correlation<br>DIN1 - DIN1-IC | p-value |
|---------|---------|----------------------------|---------|-------------------------------|---------|-------------------------------|---------|
| phylum  | F1<br>2 | 0,99692                    | 0       | 0,99491                       | 0       | 0,99921                       | 0       |
|         | F9      | 0,99956                    | 0       | 0,99941                       | 0       | 0,99978                       | 0       |
|         | F1<br>0 | 0,99473                    | 0       | 0,999                         | 0       | 0,99194                       | 0       |
|         | F1<br>1 | 0,99978                    | 0       | 0,99988                       | 0       | 0,99992                       | 0       |
|         | F1<br>3 | 0,99924                    | 0       | 0,99906                       | 0       | 0,99988                       | 0       |
| class   | F1<br>2 | 0,99757                    | 0       | 0,99603                       | 0       | 0,99939                       | 0       |
|         | F9      | 0,99961                    | 0       | 0,99929                       | 0       | 0,99959                       | 0       |
|         | F1<br>0 | 0,9955                     | 0       | 0,99928                       | 0       | 0,99346                       | 0       |
|         | F1<br>1 | 0,99979                    | 0       | 0,99986                       | 0       | 0,99992                       | 0       |
|         | F1<br>3 | 0,99942                    | 0       | 0,99927                       | 0       | 0,9999                        | 0       |
| order   | F1<br>2 | 0,99772                    | 0       | 0,99625                       | 0       | 0,99943                       | 0       |
|         | F9      | 0,99962                    | 0       | 0,99933                       | 0       | 0,99962                       | 0       |
|         | F1<br>0 | 0,99576                    | 0       | 0,99939                       | 0       | 0,99388                       | 0       |
|         | F1<br>1 | 0,9998                     | 0       | 0,99985                       | 0       | 0,99992                       | 0       |
|         | F1<br>3 | 0,9995                     | 0       | 0,99933                       | 0       | 0,9999                        | 0       |
| family  | F1<br>2 | 0,99444                    | 0       | 0,99234                       | 0       | 0,9991                        | 0       |
|         | F9      | 0,99653                    | 0       | 0,99651                       | 0       | 0,99743                       | 0       |
|         | F1<br>0 | 0,99507                    | 0       | 0,99825                       | 0       | 0,99169                       | 0       |
|         | F1<br>1 | 0,9992                     | 0       | 0,99932                       | 0       | 0,99938                       | 0       |
|         | F1<br>3 | 0,99879                    | 0       | 0,99837                       | 0       | 0,99956                       | 0       |
| genus   | F1<br>2 | 0,9924                     | 0       | 0,99062                       | 0       | 0,99907                       | 0       |
|         | F9      | 0,99528                    | 0       | 0,99363                       | 0       | 0,99594                       | 0       |
|         | F1<br>0 | 0,99593                    | 0       | 0,99825                       | 0       | 0,99314                       | 0       |
|         | F1<br>1 | 0,99804                    | 0       | 0,99634                       | 0       | 0,99765                       | 0       |
|         | F1<br>3 | 0,99849                    | 0       | 0,99768                       | 0       | 0,99942                       | 0       |
| species | F1<br>2 | 0,97528                    | 0       | 0,97676                       | 0       | 0,99843                       | 0       |
|         | F9      | 0,98948                    | 0       | 0,98614                       | 0       | 0,99181                       | 0       |
|         | F1<br>0 | 0,99217                    | 0       | 0,99411                       | 0       | 0,98551                       | 0       |
|         | F1<br>1 | 0,99714                    | 0       | 0,99557                       | 0       | 0,99713                       | 0       |
|         | F1<br>3 | 0,99602                    | 0       | 0,99506                       | 0       | 0,99751                       | 0       |



**Table S6. Pearson correlation among the observed relative abundances.** The observed relative taxon frequencies were pairwise compared among the three DNA qualities (i.e. DIN6, DIN1 and DIN1-IC) by inferring the Pearson correlation. The resulting data are listed according to taxonomic rank (i.e. phylum, class, order, family, genus) and for each subject (i.e. Sbj). For each measured correlation values is also listed the relevant p-value.
